# Supplementary material
Source: Royal Society of Chemistry journal article supplement (doi:10.1039/d6tc01088a)
Supplement: d6tc01088a1.pdf [file d6tc01088a1.pdf]

1  
2  
3  
4  
5  
6  
7  
8  
9  
10  
11  
12  
13

## Supporting Information

### Flexible Transparent Conductive Films Based on Slot Die Coating Induced Oriented Silver Nanowire Networks

Kaixuan Cui<sup>a</sup>, Jiaqi Shan<sup>b</sup>, Yifan Xiao<sup>a</sup>, Huaxing Zhang<sup>c</sup>, Xiaoyu Zhao<sup>c</sup>, Jianbao  
Ding<sup>d</sup>, Xingzhong Guo<sup>a,b\*</sup>

<sup>a</sup> State Key Laboratory of Silicon and Advanced Semiconductor Materials, School of Materials  
Science and Engineering, Zhejiang University, Hangzhou 310058, PR China;

<sup>b</sup> ZJU-Hangzhou Global Scientific and Technological Innovation Center, Hangzhou 311200, PR  
China;

<sup>c</sup> Zhejiang Hua Display Optoelectronics Co., Ltd, Jiaxing, 314115, PR China;

<sup>d</sup> Zhejiang Kechuang Advanced Materials Technology Co., Ltd. Hangzhou 310051, China

## 1 S1. Image Processing and Orientation Analysis

2

3 The orientation of AgNWs was analyzed using a custom Python-based image processing workflow,  
4 including image preprocessing, ridge enhancement, binarization, skeletonization, and orientation  
5 extraction via principal component analysis (PCA). A simplified version of the code is provided  
6 below:

```
# Read grayscale image
img = cv2.imread(image_path, cv2.IMREAD_GRAYSCALE)

# Background correction
img_bg = white_tophat(img, disk(15))

# Ridge enhancement (simplified)
resp = enhance_ridges_multi(img_bg)

# Thresholding (binarization)
thr = np.percentile(resp, 90)
bw = resp > thr

# Morphological refinement
bw = binary_closing(bw, disk(2))
bw = remove_small_objects(bw, 30)

# Skeletonization
sk = skeletonize(bw)

# PCA-based orientation calculation
coords = np.column_stack(np.nonzero(sk))
cov = np.cov(coords.T)
eigvals, eigvecs = np.linalg.eig(cov)

# Orientation angle (radian)
angle = np.arctan2(eigvecs[1, 0], eigvecs[0, 0])
angle_deg = np.degrees(angle)
```

7 Wherein *img* represents the original SEM image, *resp* is the enhanced ridge response, *bw* denotes  
8 the binarized image, and *coords* corresponds to the pixel coordinates of the extracted nanowire  
9 skeleton.

10

1 **Fig. S1.** Schematic illustration of the formation mechanism of the insulating HPMC layer in bilayer  
2 orthogonal AgNWs TCFs.  
3

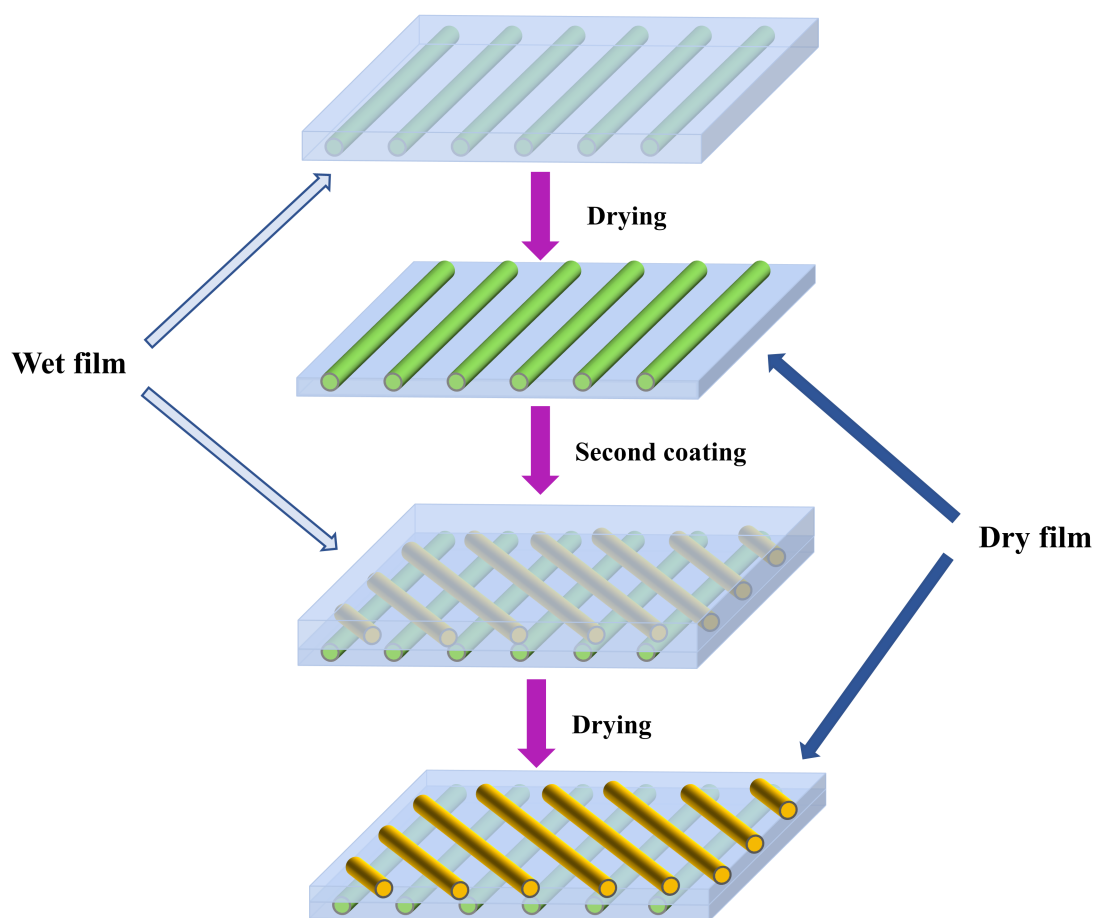

4  
5

1 **Fig. S2.** Additional SEM images

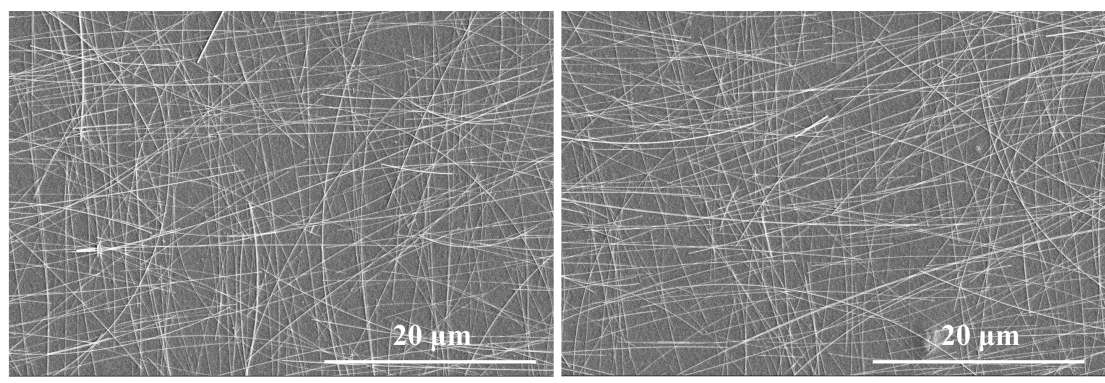

2

3

1 **Fig. S3.** SEM and AFM images of randomly distributed AgNWs films with comparable sheet  
2 resistance prepared by single slot-die coating.

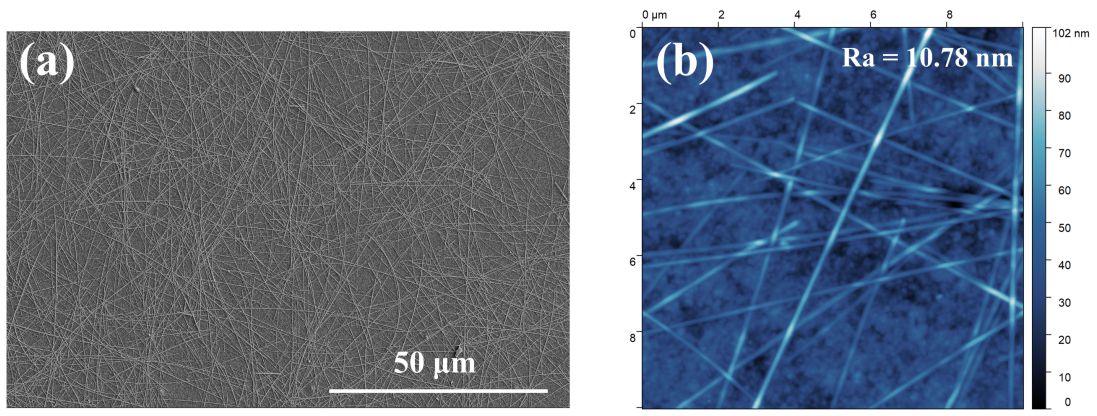

3
